# Supplementary material for: Two novel lead(ii) carboxyphosphonates with a layered and a 3D framework structure: syntheses, crystal structures, reversible dehydration/hydration, and luminescence properties
Source: Royal Society of Chemistry journal article supplement (doi:10.1039/c3dt00125c), 2013-01-01
Supplement: c3dt00125c.pdf [file c3dt00125c.pdf]

# Two novel lead(II) carboxyphosphonates with a layered and a 3D framework structure: syntheses, crystal structures, reversible dehydration/hydration, and luminescence properties

Wei Chu, Zhen-Gang Sun,\* Cheng-Qi Jiao, Yan-Yu Zhu, Shou-Hui Sun, Hui Tian, Ming-Jing Zheng, Lu-Lu Dai, Shao-Ping Shi and Wei Zhou

## Supplementary Materials

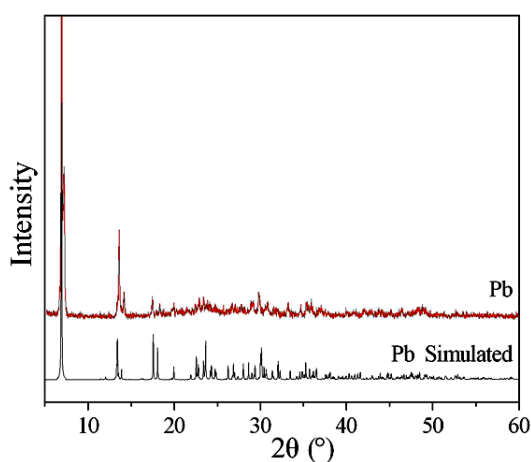

**Fig. S1** The experimental powder XRD patterns and the simulated XRD patterns of compound 1.

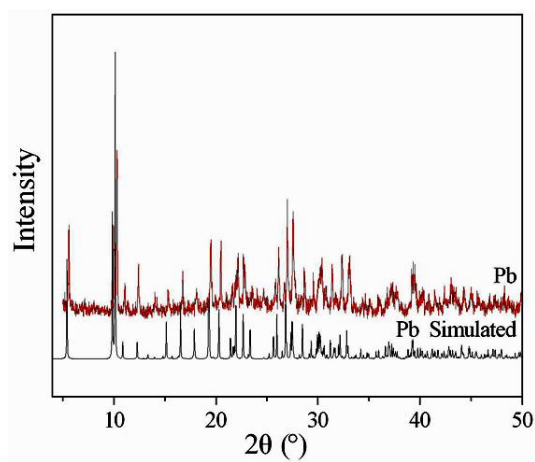

**Fig. S2** The experimental powder XRD patterns and the simulated XRD patterns of compound 2.

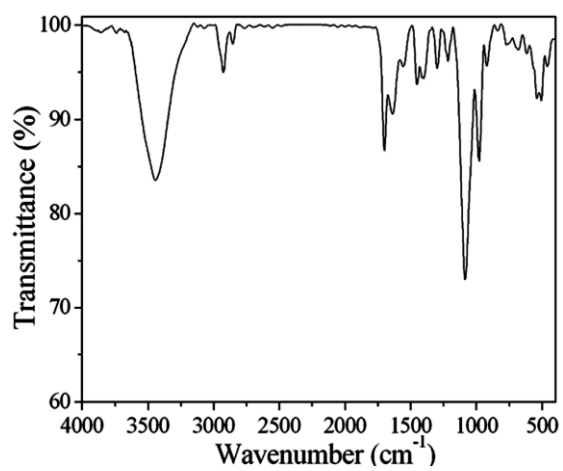

**Fig. S3** The IR spectrum of compound **1**.

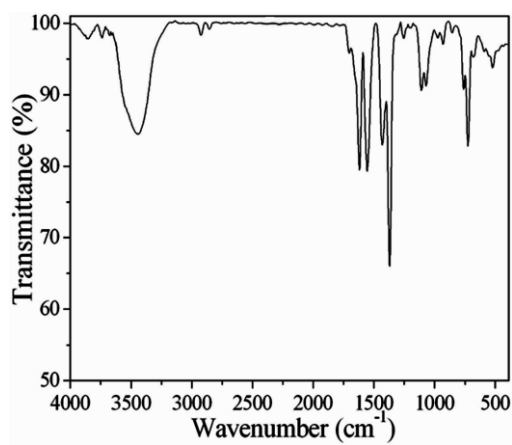

**Fig. S4** The IR spectrum of compound **2**.

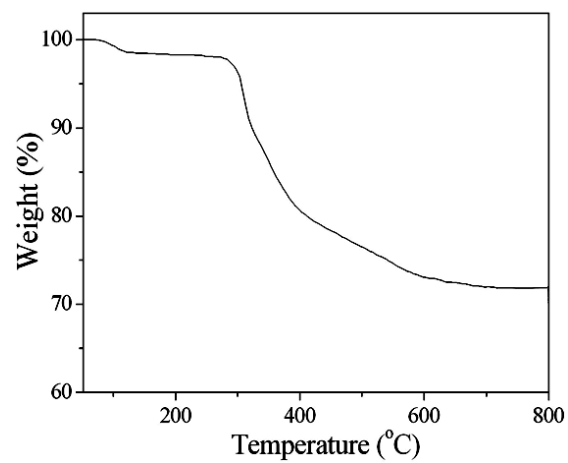

**Fig. S5** The TGA curve of compound 1.

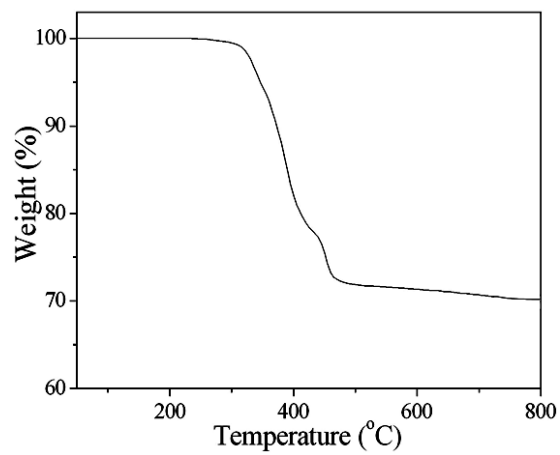

**Fig. S6** The TGA curve of compound 2.

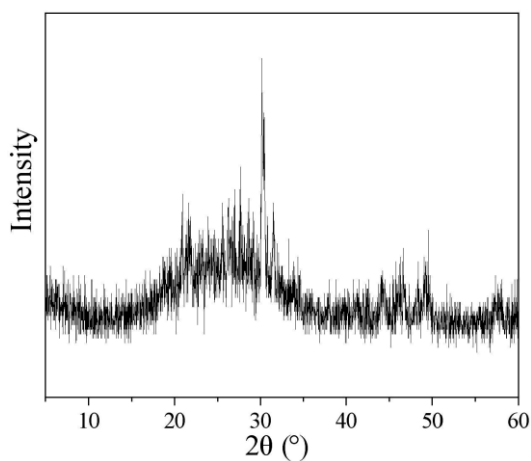

**Fig. S7.** The X-ray power diffraction patterns of the final products in the thermal decomposition for compounds **1** and **2**. The final products are  $\text{Pb}_2\text{P}_2\text{O}_7$  and  $\text{PbO}$  in a 1:2 molar ratio (JCPDS 00-026-0629)

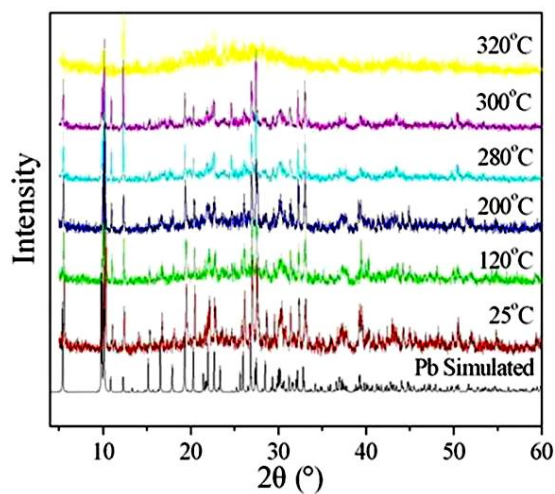

**Fig. S8.** The PXRD patterns for compound **2** on heating from 25–320 °C.
